# Supplementary material for: Optical properties of size selected neutral Ag clusters: electronic shell structures and the surface plasmon resonance
Source: Royal Society of Chemistry journal article supplement (doi:10.1039/c8nr04861d), 2018-01-01
Supplement: c8nr04861d1.pdf [file c8nr04861d1.pdf]

## Supporting Information

### Optical properties of size selected neutral Ag clusters: electronic shell structures and the surface plasmon resonance

Chongqi Yu,<sup>\*a</sup> Romain Schira,<sup>b‡</sup> Harald Brune,<sup>a‡</sup> Bernd von Issendorff,<sup>c‡</sup> Franck Rabilloud,<sup>b‡</sup> and Wolfgang Harbich<sup>a</sup>

<sup>a</sup> Institute of Physics, Ecole Polytechnique Fédérale de Lausanne (EPFL), CH-1015 Lausanne, Switzerland

<sup>b</sup> Université Claude Bernard Lyon 1, CNRS, Institut Lumière Matière, F-69622 Villeurbanne, France

<sup>c</sup> Universität Fakultät für Physik, Universität Freiburg, Germany

DFT calculations have been performed using the exchange and correlation functional  $\omega$ B97x<sup>1</sup> and a relativistic effective core potential (RECP), so that only 19 electrons per atom were treated explicitly, together with the corresponding Gaussian basis set<sup>2,3</sup>. The geometrical structures of Ag<sub>n</sub> have been taken from a study by Chen *et al.*<sup>4</sup> using a genetic algorithm with an embedded atom method potential, except that of Ag<sub>20</sub> which has been taken as the ground state structure of C<sub>s</sub> symmetry obtained with DFT<sup>5</sup>. Calculations have been performed with the Gaussian09 suite of programs<sup>6</sup>.

The three figures **S1**, **S2**, **S3** give the density of states (DOS) together with the Kohn-Sham orbitals of valence orbitals for Ag<sub>20</sub>, Ag<sub>55</sub> and Ag<sub>92</sub>. The s-type valence electrons are found to be distributed in the following energy sequence of electronic shell model 1S<sup>2</sup>, 1P<sup>6</sup>, 1D<sup>10</sup>, 2S<sup>2</sup>, 1F<sup>14</sup>, 2P<sup>6</sup>, 1G<sup>18</sup>, 2D<sup>10</sup>, 3S<sup>2</sup>, 1H<sup>22</sup>. We can easily distinguish the orbitals associated to S, P, D, F, G supershells. Some shells are splitting into subshells due to the lower symmetry with respect to the K<sub>n</sub> group for a perfect sphere, and the atomic structure.

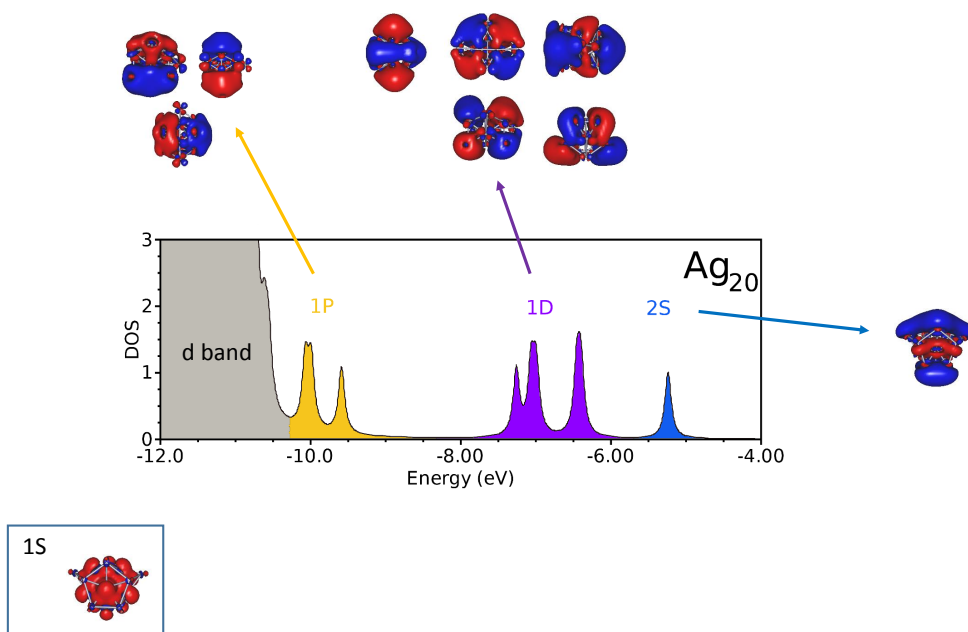

**Figure S1:** Density of states of Ag<sub>20</sub> together with the representative Kohn-Sham molecular orbitals. Blue and red refer to positive and negative sign of the molecular orbitals. The orbital 1S is located inside the d band.

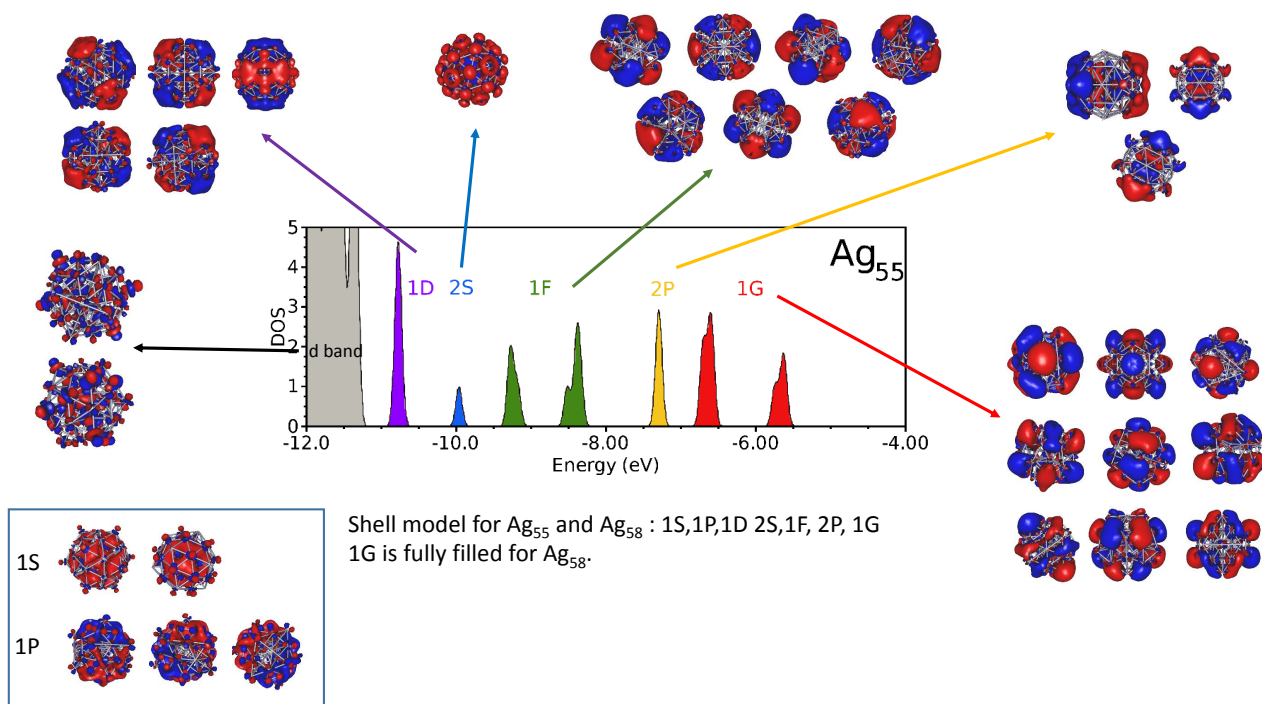

**Figure S2:** Density of states of  $\text{Ag}_{55}$  together with the representative Kohn-Sham molecular orbitals. Blue and red refer to positive and negative sign of the molecular orbitals. The orbitals 1S and 1P are located inside the d band.

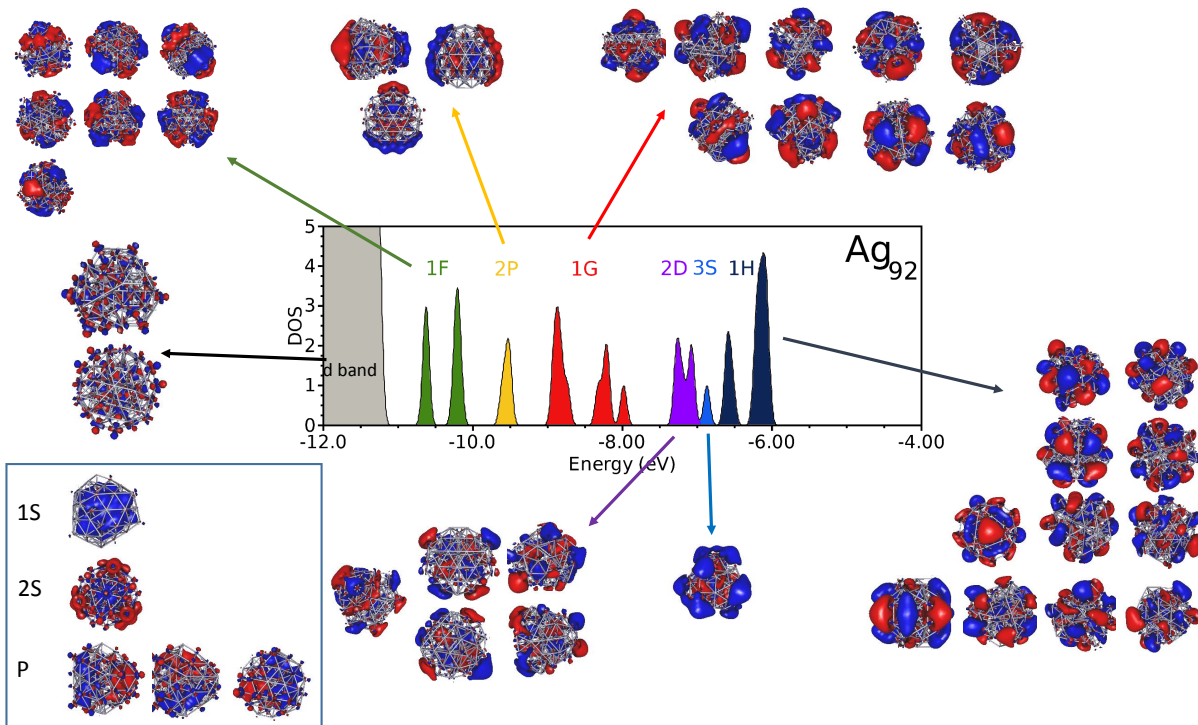

**Figure S3:** Density of states of  $\text{Ag}_{92}$  together with the representative Kohn-Sham molecular orbitals. Blue and red refer to positive and negative sign of the molecular orbitals. The orbitals 1S, 1P, 1D, and 2S are located inside the d band.

## Notes and references

- 1 J. D. Chai and M. Head-Gordon, *J. Chem. Phys.*, 2008, **128**, 084106.
- 2 P. J. Hay and W. R. Wadt, *J. Chem. Phys.*, 1985, **82**, 299.
- 3 D. Andrae, U. Haussermann, M. Dolg, H. Stoll and H. Preuss, *Theor. Chem. Acc.*, 1990, **77**, 123.
- 4 M. Chen, J. E. Dyer, K. Li and D. A. Dixon, *J. Phys. Chem. A*, 2013, **117**, 8298.
- 5 M. Harb, F. Rabilloud, D. Simon, A. Rydlo, S. Lecoultre, F. Conus, V. Rodrigues and C. Félix, *J. Chem. Phys.*, 2008, **129**, 194108.
- 6 M. J. Frisch, G. W. Trucks, H. B. Schlegel, G. E. Scuseria, M. A. Robb, J. R. Cheeseman, G. Scalmani, V. Barone, B. Mennucci, G. A. Petersson, H. Nakatsuji, M. Caricato, X. Li, H. P. Hratchian, A. F. Izmaylov, J. Bloino, G. Zheng, J. L. Sonnenberg, M. Hada, M. Ehara, K. Toyota, R. Fukuda, J. Hasegawa, M. Ishida, T. Nakajima, Y. Honda, O. Kitao, H. Nakai, T. Vreven, J. A. M. Jr., J. E. Peralta, F. Ogliaro, M. Bearpark, J. J. Heyd, E. Brothers, K. N. Kudin, V. N. Staroverov, R. Kobayashi, J. Normand, K. Raghavachari, A. Rendell, J. C. Burant, S. S. Iyengar, J. Tomasi, M. Cossi, N. Rega, J. M. Millam, M. Klene, J. E. Knox, J. B. Cross, V. Bakken, C. Adamo, J. Jaramillo, R. Gomperts, R. E. Stratmann, O. Yazyev, A. J. Austin, R. Cammi, C. Pomelli, J. W. Ochterski, R. L. Martin, K. Morokuma, V. G. Zakrzewski, G. A. Voth, P. Salvador, J. J. Dannenberg, S. Dapprich, A. D. Daniels, A. Farkas, J. B. Foresman, J. V. Ortiz, J. Cioslowski and D. J. Fox, *Gaussian 09 Revision D.01*, Gaussian Inc. Wallingford CT, 2009.

Optimized coordinates of Ag<sub>n</sub>@Ne<sub>100</sub>.

Ag<sub>20</sub>Ne<sub>100</sub>

|    |               |               |               |
|----|---------------|---------------|---------------|
| Ag | -3.2158220000 | -2.3834920000 | -1.9372020000 |
| Ag | -1.5704170000 | -3.6154990000 | 0.2380080000  |
| Ag | -0.2095250000 | -2.3218850000 | -1.8854320000 |
| Ag | -1.7797220000 | -0.0107180000 | -2.7574470000 |
| Ag | 1.6041480000  | -4.0079410000 | -0.4135190000 |
| Ag | -2.2755730000 | -0.7994990000 | 0.0893820000  |
| Ag | 1.2171200000  | -0.3426820000 | -3.5053870000 |
| Ag | 0.4695730000  | -1.8147100000 | 0.9568200000  |
| Ag | -1.7667460000 | -1.6740010000 | 2.7525500000  |
| Ag | 0.0485730000  | 2.4363880000  | -2.6897900000 |
| Ag | 2.6621650000  | -1.4750640000 | -1.2629830000 |
| Ag | -1.9956840000 | 1.9900380000  | -0.4948370000 |
| Ag | 0.3197200000  | 0.3013000000  | -0.9211170000 |
| Ag | -0.7559980000 | 0.8299050000  | 1.8223040000  |
| Ag | 2.8110800000  | 1.3995160000  | -1.6721430000 |
| Ag | 3.1969780000  | -2.2738060000 | 1.4454080000  |
| Ag | 2.3600310000  | 0.4628990000  | 1.0644580000  |
| Ag | 0.8258700000  | 2.8182720000  | 0.2429240000  |
| Ag | 1.1897060000  | -0.6437830000 | 3.3976890000  |
| Ag | 1.1471070000  | 2.3413770000  | 3.0980240000  |
| Ne | 5.2036120000  | -5.6117720000 | -0.3260320000 |
| Ne | -0.0140360000 | 6.2011250000  | -2.9748530000 |
| Ne | -5.7264060000 | 0.5603680000  | 1.6902940000  |
| Ne | 6.7730880000  | -2.3385430000 | 0.3124280000  |
| Ne | 5.6765260000  | -4.4445360000 | 2.9431700000  |
| Ne | 8.4366140000  | -5.1627490000 | -0.3673550000 |
| Ne | 0.3214690000  | -5.5446360000 | 3.1565270000  |
| Ne | 1.3754330000  | -3.9333850000 | -5.1001520000 |
| Ne | -4.6826890000 | -5.5613870000 | -1.0533750000 |
| Ne | 2.3548440000  | 4.8317780000  | 5.5388460000  |
| Ne | -0.0339130000 | 6.9775720000  | -6.2053640000 |
| Ne | 8.8027160000  | -3.8689070000 | 3.7296110000  |
| Ne | 2.8811230000  | 4.7721150000  | -4.0419410000 |
| Ne | 6.0723740000  | 2.0297530000  | 0.6399040000  |
| Ne | -5.0772890000 | 3.4159960000  | 0.0755450000  |
| Ne | 9.4094620000  | 3.0854160000  | 0.4652530000  |
| Ne | -2.8243930000 | 5.4514780000  | -1.3261960000 |
| Ne | -4.2992330000 | 3.2448640000  | -3.3075390000 |
| Ne | -2.5932080000 | 4.8087970000  | 2.0999710000  |
| Ne | -2.9729120000 | 2.3507480000  | 4.5643270000  |
| Ne | 4.3350670000  | 4.0712650000  | 2.6382900000  |
| Ne | -4.8144080000 | 7.6179660000  | 0.1384010000  |
| Ne | 4.9718550000  | 2.9259970000  | 6.0519380000  |

|    |                |               |               |
|----|----------------|---------------|---------------|
| Ne | -2.5298160000  | -7.0791100000 | 1.9218400000  |
| Ne | 3.4105570000   | -2.6322940000 | 5.6602140000  |
| Ne | -5.7221090000  | 3.6469980000  | 3.2756740000  |
| Ne | 3.2495160000   | -6.0148550000 | -3.0897530000 |
| Ne | -9.0533040000  | 3.4200360000  | 2.7932870000  |
| Ne | -5.0128950000  | -0.3219200000 | 4.7599070000  |
| Ne | 9.0947890000   | -3.6009090000 | -3.2429740000 |
| Ne | -4.9687470000  | -2.2930080000 | 7.4287340000  |
| Ne | -4.4575460000  | -1.7384960000 | -5.6549700000 |
| Ne | 6.0921380000   | -5.0537530000 | -4.7371240000 |
| Ne | -1.2513910000  | 0.4927940000  | -6.5078780000 |
| Ne | 3.8211520000   | -1.5646580000 | 8.8593840000  |
| Ne | -0.3264730000  | -7.3249650000 | -0.4565580000 |
| Ne | 9.9186380000   | 6.3648810000  | 1.4310650000  |
| Ne | -4.3887290000  | 1.6152990000  | -6.1655440000 |
| Ne | -7.9276540000  | -1.0078260000 | 6.4560350000  |
| Ne | 6.7370280000   | -0.2474510000 | 9.8748980000  |
| Ne | 5.4659820000   | -0.2664070000 | 3.8215170000  |
| Ne | 6.0752270000   | -0.2813480000 | -3.3064330000 |
| Ne | -3.2710870000  | -4.8453060000 | -4.5041960000 |
| Ne | -0.4056390000  | -6.0802610000 | -3.4016540000 |
| Ne | -8.6236230000  | 5.0569130000  | 5.7756230000  |
| Ne | -7.7187840000  | -1.7789380000 | 3.2546810000  |
| Ne | -7.9439440000  | -3.6342720000 | 8.5775680000  |
| Ne | 1.8038780000   | -7.1949580000 | -5.8147670000 |
| Ne | -7.3123180000  | 5.5997360000  | 0.9040250000  |
| Ne | -5.7864070000  | -2.9164940000 | 0.9023500000  |
| Ne | -10.3273180000 | 0.2626540000  | 3.4734200000  |
| Ne | -4.6422000000  | -4.9402030000 | 3.1683890000  |
| Ne | -7.4287720000  | 3.7923730000  | -2.0779890000 |
| Ne | -3.0860980000  | 7.9581700000  | 2.9783150000  |
| Ne | 2.5266450000   | -9.3182210000 | -3.3272830000 |
| Ne | -0.0612010000  | 8.7329810000  | 4.2402440000  |
| Ne | 4.8081490000   | 4.4216700000  | 9.1897260000  |
| Ne | 4.1766200000   | -2.0831390000 | -5.4209200000 |
| Ne | 0.4857110000   | -8.8820600000 | 2.2386700000  |
| Ne | -6.3300320000  | -3.5314270000 | -3.4182630000 |
| Ne | 9.1691820000   | -0.4739140000 | -4.3803940000 |
| Ne | 5.8475040000   | 3.1006640000  | -3.9745390000 |
| Ne | 8.5696460000   | 4.6288830000  | -5.5576450000 |
| Ne | -2.9142640000  | 6.6976470000  | -4.6268380000 |
| Ne | -9.4122270000  | 1.9086090000  | 7.2805280000  |
| Ne | -3.6702480000  | -6.0588780000 | -7.4995250000 |
| Ne | -4.8071970000  | -3.1535370000 | 10.6471720000 |
| Ne | 0.6686290000   | 6.4274740000  | 0.3059590000  |
| Ne | -5.6996580000  | 6.4634610000  | -2.9679210000 |
| Ne | 6.2965000000   | -3.3764100000 | -7.6566720000 |
| Ne | 3.4771600000   | 7.7963330000  | -2.8071770000 |

|    |               |                |               |
|----|---------------|----------------|---------------|
| Ne | -2.3830910000 | 2.6747060000   | -8.6665260000 |
| Ne | -3.2990340000 | -8.4810890000  | -1.0981080000 |
| Ne | 3.7999490000  | 1.4430170000   | 10.3230620000 |
| Ne | 2.7927850000  | -8.0161190000  | -0.2701450000 |
| Ne | 2.6240120000  | 7.0040150000   | 3.0702820000  |
| Ne | 5.4678140000  | 6.1268670000   | 4.8964200000  |
| Ne | -8.7477310000 | -4.2522900000  | 1.1363290000  |
| Ne | 5.1542120000  | 6.8357580000   | -5.6395620000 |
| Ne | -9.0112100000 | -2.5859190000  | -5.1689080000 |
| Ne | -2.3160600000 | 8.6062760000   | -1.9833570000 |
| Ne | 1.7833020000  | 3.2867060000   | 8.4027060000  |
| Ne | -9.2399230000 | 1.7353070000   | -0.1496790000 |
| Ne | -9.0935350000 | -2.7741600000  | -1.8024500000 |
| Ne | 1.5192500000  | 3.9304350000   | 11.7073940000 |
| Ne | 5.0026590000  | 9.3184620000   | 3.9880950000  |
| Ne | 4.5241810000  | -7.5154160000  | 2.4568540000  |
| Ne | 3.5730340000  | -4.8354840000  | 8.2358470000  |
| Ne | -3.7612780000 | 10.1993120000  | -4.4685430000 |
| Ne | 0.0671280000  | 3.6709800000   | -6.0809730000 |
| Ne | 8.4140390000  | 0.2361100000   | -1.0443110000 |
| Ne | -6.0151490000 | -6.7837540000  | -3.8252970000 |
| Ne | -6.9947030000 | 2.1590030000   | -8.3433930000 |
| Ne | 3.9759390000  | 6.0265310000   | 0.0082220000  |
| Ne | -7.5808570000 | -6.8558910000  | -0.6654010000 |
| Ne | 0.9845880000  | -10.8504400000 | -0.7830520000 |
| Ne | 0.0433470000  | 9.9944590000   | -4.9206320000 |
| Ne | -5.6612050000 | 8.0097990000   | -6.0832630000 |
| Ne | 11.4058190000 | 0.9868960000   | -2.4296370000 |
| Ne | 2.6529070000  | 5.4159370000   | -7.3341110000 |

Ag58Ne100

|    |               |               |               |
|----|---------------|---------------|---------------|
| Ag | 1.3608070000  | -2.0508860000 | -1.4424860000 |
| Ag | -4.0570240000 | -0.6354370000 | 2.3138250000  |
| Ag | -1.1705160000 | -0.7412610000 | 2.3253480000  |
| Ag | 2.5703190000  | -4.0079250000 | -2.9094840000 |
| Ag | -4.0289560000 | -2.3943490000 | 0.0000000000  |
| Ag | -0.1219420000 | -4.5796510000 | -1.8800040000 |
| Ag | -2.6521390000 | -3.1896040000 | 2.2806870000  |
| Ag | 2.0398780000  | -6.3768390000 | -1.4580480000 |
| Ag | -2.4682760000 | -1.4722790000 | 4.6082000000  |
| Ag | -5.3758320000 | 0.2059300000  | 0.0000000000  |
| Ag | -2.6368210000 | 0.1114220000  | 0.0000000000  |
| Ag | -2.4131590000 | 1.3271460000  | 3.8180590000  |
| Ag | 0.1181440000  | 2.8186160000  | 3.9209450000  |
| Ag | 0.3228550000  | 4.7341800000  | -1.4620060000 |
| Ag | 2.7339460000  | 4.9309900000  | 0.0000000000  |
| Ag | 1.4370530000  | 2.5218630000  | 0.0000000000  |
| Ag | 0.1473570000  | 0.0335650000  | 0.0000000000  |
| Ag | -1.1337160000 | -2.4664360000 | 0.0000000000  |
| Ag | 4.2270970000  | 0.6961280000  | 2.5287350000  |
| Ag | 0.2572670000  | 0.1315160000  | -4.8447030000 |
| Ag | 2.9288670000  | -0.0583730000 | 0.0000000000  |
| Ag | -2.4658450000 | -4.8468530000 | 0.0000000000  |
| Ag | 2.5598610000  | -1.3747110000 | 3.9422630000  |
| Ag | 2.9287080000  | -4.1075490000 | 0.0000000000  |
| Ag | 4.1728850000  | -2.0844430000 | 1.6546580000  |
| Ag | 0.2155920000  | -2.6642200000 | -4.0196640000 |
| Ag | -0.4052010000 | -6.7841490000 | 0.0000000000  |
| Ag | 5.6532930000  | -0.1193690000 | 0.0000000000  |
| Ag | 2.5520740000  | 1.4328030000  | 4.7749570000  |
| Ag | 1.3616450000  | 0.7301930000  | 2.4076700000  |
| Ag | 4.2710520000  | 2.4406180000  | 0.0000000000  |
| Ag | 2.8250970000  | 3.3170980000  | -2.2785860000 |
| Ag | -3.8331160000 | 2.2378740000  | -1.5618080000 |
| Ag | -2.3263920000 | 4.2928550000  | 0.0000000000  |
| Ag | -2.1350580000 | 4.1774920000  | -2.8836710000 |
| Ag | -1.0014510000 | 2.1445070000  | -1.4443600000 |
| Ag | 1.3608070000  | -2.0508860000 | 1.4424860000  |
| Ag | -4.0570240000 | -0.6354370000 | -2.3138250000 |
| Ag | -1.1705160000 | -0.7412610000 | -2.3253480000 |
| Ag | 2.5703190000  | -4.0079250000 | 2.9094840000  |
| Ag | -0.1219420000 | -4.5796510000 | 1.8800040000  |
| Ag | -2.6521390000 | -3.1896040000 | -2.2806870000 |
| Ag | 2.0398780000  | -6.3768390000 | 1.4580480000  |
| Ag | -2.4682760000 | -1.4722790000 | -4.6082000000 |
| Ag | -2.4131590000 | 1.3271460000  | -3.8180590000 |
| Ag | 0.1181440000  | 2.8186160000  | -3.9209450000 |

|    |               |                |               |
|----|---------------|----------------|---------------|
| Ag | 0.3228550000  | 4.7341800000   | 1.4620060000  |
| Ag | 4.2270970000  | 0.6961280000   | -2.5287350000 |
| Ag | 0.2572670000  | 0.1315160000   | 4.8447030000  |
| Ag | 2.5598610000  | -1.3747110000  | -3.9422630000 |
| Ag | 4.1728850000  | -2.0844430000  | -1.6546580000 |
| Ag | 0.2155920000  | -2.6642200000  | 4.0196640000  |
| Ag | 2.5520740000  | 1.4328030000   | -4.7749570000 |
| Ag | 1.3616450000  | 0.7301930000   | -2.4076700000 |
| Ag | 2.8250970000  | 3.3170980000   | 2.2785860000  |
| Ag | -3.8331160000 | 2.2378740000   | 1.5618080000  |
| Ag | -2.1350580000 | 4.1774920000   | 2.8836710000  |
| Ag | -1.0014510000 | 2.1445070000   | 1.4443600000  |
| Ne | 2.5312810000  | 7.5756300000   | -3.2340720000 |
| Ne | -6.3344750000 | 4.9948790000   | -1.6679820000 |
| Ne | 3.2794070000  | -9.1027660000  | -3.3489080000 |
| Ne | -1.3982010000 | -8.6887220000  | -2.9133190000 |
| Ne | -1.0517010000 | -9.0729830000  | -6.0734660000 |
| Ne | -0.0596770000 | 9.2033140000   | -1.7378650000 |
| Ne | 0.3836470000  | 6.4101210000   | -5.3674180000 |
| Ne | -4.1867800000 | -6.8651670000  | -2.7500540000 |
| Ne | 6.2435040000  | 3.1080260000   | -4.6250040000 |
| Ne | -0.2604470000 | -11.6317830000 | -1.8787920000 |
| Ne | -2.4099750000 | 10.4577190000  | -4.0952650000 |
| Ne | -6.5591600000 | -2.9575390000  | -3.9475020000 |
| Ne | -1.3765230000 | 5.0975220000   | -7.9132360000 |
| Ne | 0.4613610000  | 12.6497040000  | -1.6664060000 |
| Ne | 4.9157280000  | -0.7137270000  | -6.9276810000 |
| Ne | -4.0753270000 | -4.8422660000  | -5.2741730000 |
| Ne | 3.0653180000  | 10.6619980000  | -1.7013060000 |
| Ne | -7.1326990000 | -6.2582940000  | -5.2955580000 |
| Ne | 7.4933740000  | -2.9099520000  | -2.7634820000 |
| Ne | -3.3608410000 | 13.7227300000  | -5.1754640000 |
| Ne | 0.1006460000  | -5.9716190000  | -5.8020220000 |
| Ne | 2.7843310000  | 3.7555890000   | -7.5196540000 |
| Ne | 5.9022850000  | -5.9357050000  | -2.7696180000 |
| Ne | 4.6047030000  | 5.9579430000   | -4.5769310000 |
| Ne | -1.0936490000 | 15.2328900000  | -3.2044580000 |
| Ne | 0.3291750000  | -12.1674840000 | -6.3838890000 |
| Ne | 1.0418850000  | 11.6845080000  | -4.7181680000 |
| Ne | 4.2626210000  | -12.2202190000 | -3.6269610000 |
| Ne | 1.9602750000  | 15.6709630000  | -1.7362160000 |
| Ne | 7.8153480000  | 1.9329690000   | -7.1842730000 |
| Ne | -4.4185630000 | -2.5931750000  | -7.8215530000 |
| Ne | 0.4253330000  | -3.4180050000  | -8.1421990000 |
| Ne | -5.5415750000 | 0.1501450000   | -6.2392640000 |
| Ne | -4.8875690000 | 7.4341430000   | -3.5030760000 |
| Ne | -7.8223760000 | 7.9106710000   | -1.6943020000 |
| Ne | 7.7511000000  | -0.7344190000  | -5.2044380000 |



|    |               |                |                |
|----|---------------|----------------|----------------|
| Ne | 2.7992180000  | -7.4403120000  | -7.0692910000  |
| Ne | -3.0497350000 | -6.4217080000  | -7.9518310000  |
| Ne | -5.3038550000 | -8.8139520000  | -8.9445520000  |
| Ne | 6.5896730000  | 8.6128800000   | -5.5508500000  |
| Ne | -7.3060300000 | -1.2258920000  | -9.3689710000  |
| Ne | -3.0844300000 | -6.8943870000  | -11.2640940000 |
| Ne | -8.6050140000 | 0.3477050000   | -5.1974310000  |
| Ne | -3.0097200000 | -11.9451150000 | -6.0670530000  |
| Ne | -3.8933520000 | 7.4974450000   | -7.7928160000  |
| Ne | -8.1965530000 | 2.0469790000   | -8.1822110000  |
| Ne | 8.4037530000  | 1.4938300000   | -2.7735080000  |
| Ne | 3.6813980000  | 13.3971090000  | -3.5316780000  |
| Ne | 0.1826930000  | -5.8488260000  | -10.9127670000 |
| Ne | -8.8844210000 | 7.8498280000   | -4.8620440000  |
| Ne | 2.5312810000  | 7.5756300000   | 3.2340720000   |
| Ne | -6.3344750000 | 4.9948790000   | 1.6679820000   |
| Ne | 3.2794070000  | -9.1027660000  | 3.3489080000   |
| Ne | -1.3982010000 | -8.6887220000  | 2.9133190000   |
| Ne | -1.0517010000 | -9.0729830000  | 6.0734660000   |
| Ne | -0.0596770000 | 9.2033140000   | 1.7378650000   |
| Ne | 0.3836470000  | 6.4101210000   | 5.3674180000   |
| Ne | -4.1867800000 | -6.8651670000  | 2.7500540000   |
| Ne | 6.2435040000  | 3.1080260000   | 4.6250040000   |
| Ne | -0.2604470000 | -11.6317830000 | 1.8787920000   |
| Ne | -2.4099750000 | 10.4577190000  | 4.0952650000   |
| Ne | -6.5591600000 | -2.9575390000  | 3.9475020000   |
| Ne | -1.3765230000 | 5.0975220000   | 7.9132360000   |
| Ne | 0.4613610000  | 12.6497040000  | 1.6664060000   |
| Ne | 4.9157280000  | -0.7137270000  | 6.9276810000   |
| Ne | -4.0753270000 | -4.8422660000  | 5.2741730000   |
| Ne | 3.0653180000  | 10.6619980000  | 1.7013060000   |
| Ne | -7.1326990000 | -6.2582940000  | 5.2955580000   |
| Ne | 7.4933740000  | -2.9099520000  | 2.7634820000   |
| Ne | -3.3608410000 | 13.7227300000  | 5.1754640000   |
| Ne | 0.1006460000  | -5.9716190000  | 5.8020220000   |
| Ne | 2.7843310000  | 3.7555890000   | 7.5196540000   |
| Ne | 5.9022850000  | -5.9357050000  | 2.7696180000   |
| Ne | 4.6047030000  | 5.9579430000   | 4.5769310000   |
| Ne | -1.0936490000 | 15.2328900000  | 3.2044580000   |
| Ne | 0.3291750000  | -12.1674840000 | 6.3838890000   |
| Ne | 1.0418850000  | 11.6845080000  | 4.7181680000   |
| Ne | 4.2626210000  | -12.2202190000 | 3.6269610000   |
| Ne | 1.9602750000  | 15.6709630000  | 1.7362160000   |
| Ne | 7.8153480000  | 1.9329690000   | 7.1842730000   |
| Ne | -4.4185630000 | -2.5931750000  | 7.8215530000   |
| Ne | 0.4253330000  | -3.4180050000  | 8.1421990000   |
| Ne | -5.5415750000 | 0.1501450000   | 6.2392640000   |
| Ne | -4.8875690000 | 7.4341430000   | 3.5030760000   |

|    |               |                |               |
|----|---------------|----------------|---------------|
| Ne | -7.8223760000 | 7.9106710000   | 1.6943020000  |
| Ne | 7.7511000000  | -0.7344190000  | 5.2044380000  |
| Ne | 2.7992180000  | -7.4403120000  | 7.0692910000  |
| Ne | -3.0497350000 | -6.4217080000  | 7.9518310000  |
| Ne | -5.3038550000 | -8.8139520000  | 8.9445520000  |
| Ne | 6.5896730000  | 8.6128800000   | 5.5508500000  |
| Ne | -7.3060300000 | -1.2258920000  | 9.3689710000  |
| Ne | -3.0844300000 | -6.8943870000  | 11.2640940000 |
| Ne | -8.6050140000 | 0.3477050000   | 5.1974310000  |
| Ne | -3.0097200000 | -11.9451150000 | 6.0670530000  |
| Ne | -3.8933520000 | 7.4974450000   | 7.7928160000  |
| Ne | -8.1965530000 | 2.0469790000   | 8.1822110000  |
| Ne | 8.4037530000  | 1.4938300000   | 2.7735080000  |
| Ne | 3.6813980000  | 13.3971090000  | 3.5316780000  |
| Ne | 0.1826930000  | -5.8488260000  | 10.9127670000 |
| Ne | -8.8844210000 | 7.8498280000   | 4.8620440000  |

## Ag92Ne100

|    |               |               |               |
|----|---------------|---------------|---------------|
| Ag | -4.3189520000 | -3.9416540000 | 2.4157670000  |
| Ag | -5.7986000000 | -1.2695260000 | 2.4240730000  |
| Ag | -4.4304990000 | -0.4934820000 | 0.0000000000  |
| Ag | -1.6313000000 | -0.7039450000 | 0.0000000000  |
| Ag | -4.5161830000 | 1.2898620000  | 2.5822190000  |
| Ag | -4.2090810000 | 4.0065550000  | 1.5376140000  |
| Ag | -2.4918790000 | 5.9043280000  | 0.0000000000  |
| Ag | 1.0647620000  | 2.3691460000  | -2.3800130000 |
| Ag | -1.3379760000 | 3.8188750000  | -1.5001640000 |
| Ag | -2.4147590000 | 5.8838190000  | -2.9816770000 |
| Ag | 2.3893950000  | 2.9858010000  | -4.7806460000 |
| Ag | -0.2515420000 | 1.7486740000  | 0.0000000000  |
| Ag | -2.9452040000 | 0.4487220000  | -4.8873310000 |
| Ag | -1.7689230000 | -1.8781100000 | -6.1057220000 |
| Ag | -2.7257970000 | 3.1753190000  | -4.0244310000 |
| Ag | -2.9677660000 | -1.3797680000 | -2.3517890000 |
| Ag | -5.8697170000 | -2.9737220000 | 0.0000000000  |
| Ag | -7.1523790000 | -0.3672550000 | 0.0000000000  |
| Ag | -1.5795730000 | 1.0924040000  | -2.4179460000 |
| Ag | 0.4635170000  | -5.2364120000 | -2.9037490000 |
| Ag | 2.9528140000  | -4.7659320000 | -4.3473370000 |
| Ag | 1.8662560000  | -2.6477260000 | -2.8633920000 |
| Ag | -0.6418850000 | -2.9559920000 | -1.5272230000 |
| Ag | -1.9610190000 | -3.8873820000 | -3.9824190000 |
| Ag | 0.5082130000  | -5.3975850000 | 0.0000000000  |
| Ag | 0.5371230000  | -3.4324060000 | -5.2496150000 |
| Ag | 4.6835980000  | -2.9855310000 | 2.8310200000  |
| Ag | 0.8142040000  | -0.5636160000 | -6.2717420000 |
| Ag | 4.9872640000  | -0.1203170000 | 3.8396370000  |
| Ag | 2.1205750000  | 0.2067910000  | -3.8113980000 |
| Ag | 2.1205750000  | 0.2067910000  | 3.8113980000  |
| Ag | 0.7956520000  | -0.4422370000 | -1.4147740000 |
| Ag | 0.7956520000  | -0.4422370000 | 1.4147740000  |
| Ag | -0.3437890000 | 1.7474890000  | -5.0384970000 |
| Ag | 4.1239520000  | 2.2132990000  | 2.4275300000  |
| Ag | -0.0164580000 | 4.4497090000  | -3.9931840000 |
| Ag | 2.6486980000  | 4.7232800000  | 2.4375620000  |
| Ag | 0.1857700000  | 6.1857010000  | -1.5696170000 |
| Ag | 0.1857700000  | 6.1857010000  | 1.5696170000  |
| Ag | 1.0647620000  | 2.3691460000  | 2.3800130000  |
| Ag | -3.0285720000 | 1.9314570000  | 0.0000000000  |
| Ag | 1.2273480000  | 4.0952810000  | 0.0000000000  |
| Ag | -1.3379760000 | 3.8188750000  | 1.5001640000  |
| Ag | 2.7066180000  | 6.4219480000  | 0.0000000000  |
| Ag | -2.4147590000 | 5.8838190000  | 2.9816770000  |
| Ag | 2.3893950000  | 2.9858010000  | 4.7806460000  |

|    |               |               |               |
|----|---------------|---------------|---------------|
| Ag | -5.8314100000 | 2.1153320000  | 0.0000000000  |
| Ag | 5.4626130000  | 1.3431550000  | 0.0000000000  |
| Ag | -2.9452040000 | 0.4487220000  | 4.8873310000  |
| Ag | 6.2977240000  | -1.0102910000 | 1.4176330000  |
| Ag | -4.2159760000 | -2.1256140000 | 4.6927730000  |
| Ag | 4.1864170000  | 3.9095110000  | 0.0000000000  |
| Ag | -2.7257970000 | 3.1753190000  | 4.0244310000  |
| Ag | 3.5652430000  | -0.6860780000 | -1.4539840000 |
| Ag | -0.4634160000 | -1.1122310000 | 3.8060890000  |
| Ag | 3.2084950000  | -2.0133850000 | -5.2736080000 |
| Ag | 3.2084950000  | -2.0133850000 | 5.2736080000  |
| Ag | 3.4244390000  | 0.7543630000  | -6.1451350000 |
| Ag | 3.4244390000  | 0.7543630000  | 6.1451350000  |
| Ag | 2.5727140000  | 1.5384320000  | 0.0000000000  |
| Ag | -1.5795730000 | 1.0924040000  | 2.4179460000  |
| Ag | 2.9962590000  | -4.9576090000 | 1.4313930000  |
| Ag | -1.9901120000 | -5.5021330000 | 1.4620940000  |
| Ag | 2.9528140000  | -4.7659320000 | 4.3473370000  |
| Ag | -4.5147530000 | -5.5547610000 | 0.0000000000  |
| Ag | 1.8662560000  | -2.6477260000 | 2.8633920000  |
| Ag | -3.0497350000 | -3.1680600000 | 0.0000000000  |
| Ag | 1.9730100000  | -2.6749880000 | 0.0000000000  |
| Ag | -0.6418850000 | -2.9559920000 | 1.5272230000  |
| Ag | 4.8773490000  | -3.1520750000 | 0.0000000000  |
| Ag | -1.9610190000 | -3.8873820000 | 3.9824190000  |
| Ag | 4.6835980000  | -2.9855310000 | -2.8310200000 |
| Ag | 4.9872640000  | -0.1203170000 | -3.8396370000 |
| Ag | 4.1239520000  | 2.2132990000  | -2.4275300000 |
| Ag | 2.6486980000  | 4.7232800000  | -2.4375620000 |
| Ag | -4.2159760000 | -2.1256140000 | -4.6927730000 |
| Ag | -0.4634160000 | -1.1122310000 | -3.8060890000 |
| Ag | -1.9901120000 | -5.5021330000 | -1.4620940000 |
| Ag | -4.3189520000 | -3.9416540000 | -2.4157670000 |
| Ag | 0.5371230000  | -3.4324060000 | 5.2496150000  |
| Ag | -5.7986000000 | -1.2695260000 | -2.4240730000 |
| Ag | 0.8142040000  | -0.5636160000 | 6.2717420000  |
| Ag | -4.5161830000 | 1.2898620000  | -2.5822190000 |
| Ag | -0.3437890000 | 1.7474890000  | 5.0384970000  |
| Ag | -4.2090810000 | 4.0065550000  | -1.5376140000 |
| Ag | -0.0164580000 | 4.4497090000  | 3.9931840000  |
| Ag | -1.7689230000 | -1.8781100000 | 6.1057220000  |
| Ag | 6.2977240000  | -1.0102910000 | -1.4176330000 |
| Ag | -2.9677660000 | -1.3797680000 | 2.3517890000  |
| Ag | 3.5652430000  | -0.6860780000 | 1.4539840000  |
| Ag | 0.4635170000  | -5.2364120000 | 2.9037490000  |
| Ag | 2.9962590000  | -4.9576090000 | -1.4313930000 |
| Ne | 6.7598500000  | -1.2711470000 | -6.5496010000 |
| Ne | 2.0749800000  | -8.2301480000 | -1.6410140000 |

|    |               |                |                |
|----|---------------|----------------|----------------|
| Ne | 0.1979220000  | -4.5873460000  | -8.4266760000  |
| Ne | 2.0911560000  | -6.7114020000  | -9.3354270000  |
| Ne | -2.1097790000 | 0.6105170000   | -8.4892350000  |
| Ne | 2.3845710000  | -3.8814580000  | -10.3056820000 |
| Ne | -2.0517100000 | 9.1266430000   | -3.7471950000  |
| Ne | -6.2385740000 | 3.6522450000   | -4.3068120000  |
| Ne | -8.0027520000 | 5.9398750000   | -3.9703960000  |
| Ne | -0.2567730000 | -8.4889840000  | -3.3276060000  |
| Ne | 3.2751420000  | -10.8147810000 | -1.4092770000  |
| Ne | -3.1347030000 | -4.6252150000  | -7.7168850000  |
| Ne | -3.8677820000 | 8.8501240000   | -6.0368810000  |
| Ne | -3.5002080000 | -7.5465240000  | -7.9158560000  |
| Ne | 7.8557230000  | -4.1945510000  | -2.5351610000  |
| Ne | -4.0848110000 | -1.1227730000  | -9.9254110000  |
| Ne | -8.8866510000 | -1.2896890000  | -3.7452670000  |
| Ne | -2.2684750000 | 3.3423400000   | -9.5689780000  |
| Ne | -3.0975660000 | 10.6759630000  | -1.4691790000  |
| Ne | 5.6603500000  | -6.7633450000  | -3.9382650000  |
| Ne | 6.2192900000  | 3.9006400000   | -4.3793960000  |
| Ne | -0.1035280000 | 3.9711260000   | -11.4740190000 |
| Ne | 0.3159070000  | 10.7613110000  | -2.9232450000  |
| Ne | 1.6098470000  | -12.1390810000 | -3.1875850000  |
| Ne | -4.3343900000 | 11.3481330000  | -4.5262820000  |
| Ne | 0.6399980000  | -9.2172220000  | -9.7869590000  |
| Ne | 4.2860520000  | -9.4096250000  | -3.6750140000  |
| Ne | 0.4606010000  | 0.5697320000   | -9.9377030000  |
| Ne | 8.7567180000  | 3.7062120000   | -5.8450750000  |
| Ne | -7.4985360000 | -5.2923430000  | -2.0642500000  |
| Ne | 7.3894100000  | 5.0915010000   | -8.0371080000  |
| Ne | 2.8821990000  | 11.8404260000  | -3.9107660000  |
| Ne | 1.1149430000  | 13.1512010000  | -1.4643900000  |
| Ne | -0.7789720000 | 8.4323370000   | -6.3814960000  |
| Ne | 6.3447300000  | 6.7480510000   | -5.0207310000  |
| Ne | 0.6683040000  | -9.1997720000  | -6.0331950000  |
| Ne | -3.2108310000 | 13.5616430000  | -2.1168610000  |
| Ne | 5.3767620000  | 1.6906640000   | -8.7420520000  |
| Ne | -2.4285080000 | 12.4804550000  | -6.4230050000  |
| Ne | -1.8515300000 | -10.2925060000 | -1.6185930000  |
| Ne | -6.8814530000 | -2.1947500000  | -6.8377580000  |
| Ne | 2.5817750000  | 4.3456420000   | -7.8621650000  |
| Ne | 11.4423610000 | 3.8104090000   | -4.5603940000  |
| Ne | -1.2990300000 | 9.3571400000   | -9.1483100000  |
| Ne | -5.5548360000 | -5.0859720000  | -9.3674500000  |
| Ne | -7.9374990000 | -4.7974650000  | -5.9977410000  |
| Ne | 7.4545130000  | 7.7667650000   | -2.5008570000  |
| Ne | -1.9847000000 | -4.1101880000  | -10.3958380000 |
| Ne | -3.7169110000 | -7.4456080000  | -3.5443930000  |
| Ne | 8.7922490000  | -1.1012480000  | -3.7483030000  |

|    |               |                |               |
|----|---------------|----------------|---------------|
| Ne | 6.7598500000  | -1.2711470000  | 6.5496010000  |
| Ne | 2.0749800000  | -8.2301480000  | 1.6410140000  |
| Ne | 0.1979220000  | -4.5873460000  | 8.4266760000  |
| Ne | 2.0911560000  | -6.7114020000  | 9.3354270000  |
| Ne | -2.1097790000 | 0.6105170000   | 8.4892350000  |
| Ne | 2.3845710000  | -3.8814580000  | 10.3056820000 |
| Ne | -2.0517100000 | 9.1266430000   | 3.7471950000  |
| Ne | -6.2385740000 | 3.6522450000   | 4.3068120000  |
| Ne | -8.0027520000 | 5.9398750000   | 3.9703960000  |
| Ne | -0.2567730000 | -8.4889840000  | 3.3276060000  |
| Ne | 3.2751420000  | -10.8147810000 | 1.4092770000  |
| Ne | -3.1347030000 | -4.6252150000  | 7.7168850000  |
| Ne | -3.8677820000 | 8.8501240000   | 6.0368810000  |
| Ne | -3.5002080000 | -7.5465240000  | 7.9158560000  |
| Ne | 7.8557230000  | -4.1945510000  | 2.5351610000  |
| Ne | -4.0848110000 | -1.1227730000  | 9.9254110000  |
| Ne | -8.8866510000 | -1.2896890000  | 3.7452670000  |
| Ne | -2.2684750000 | 3.3423400000   | 9.5689780000  |
| Ne | -3.0975660000 | 10.6759630000  | 1.4691790000  |
| Ne | 5.6603500000  | -6.7633450000  | 3.9382650000  |
| Ne | 6.2192900000  | 3.9006400000   | 4.3793960000  |
| Ne | -0.1035280000 | 3.9711260000   | 11.4740190000 |
| Ne | 0.3159070000  | 10.7613110000  | 2.9232450000  |
| Ne | 1.6098470000  | -12.1390810000 | 3.1875850000  |
| Ne | -4.3343900000 | 11.3481330000  | 4.5262820000  |
| Ne | 0.6399980000  | -9.2172220000  | 9.7869590000  |
| Ne | 4.2860520000  | -9.4096250000  | 3.6750140000  |
| Ne | 0.4606010000  | 0.5697320000   | 9.9377030000  |
| Ne | 8.7567180000  | 3.7062120000   | 5.8450750000  |
| Ne | -7.4985360000 | -5.2923430000  | 2.0642500000  |
| Ne | 7.3894100000  | 5.0915010000   | 8.0371080000  |
| Ne | 2.8821990000  | 11.8404260000  | 3.9107660000  |
| Ne | 1.1149430000  | 13.1512010000  | 1.4643900000  |
| Ne | -0.7789720000 | 8.4323370000   | 6.3814960000  |
| Ne | 6.3447300000  | 6.7480510000   | 5.0207310000  |
| Ne | 0.6683040000  | -9.1997720000  | 6.0331950000  |
| Ne | -3.2108310000 | 13.5616430000  | 2.1168610000  |
| Ne | 5.3767620000  | 1.6906640000   | 8.7420520000  |
| Ne | -2.4285080000 | 12.4804550000  | 6.4230050000  |
| Ne | -1.8515300000 | -10.2925060000 | 1.6185930000  |
| Ne | -6.8814530000 | -2.1947500000  | 6.8377580000  |
| Ne | 2.5817750000  | 4.3456420000   | 7.8621650000  |
| Ne | 11.4423610000 | 3.8104090000   | 4.5603940000  |
| Ne | -1.2990300000 | 9.3571400000   | 9.1483100000  |
| Ne | -5.5548360000 | -5.0859720000  | 9.3674500000  |
| Ne | -7.9374990000 | -4.7974650000  | 5.9977410000  |
| Ne | 7.4545130000  | 7.7667650000   | 2.5008570000  |
| Ne | -1.9847000000 | -4.1101880000  | 10.3958380000 |

|    |               |               |              |
|----|---------------|---------------|--------------|
| Ne | -3.7169110000 | -7.4456080000 | 3.5443930000 |
| Ne | 8.7922490000  | -1.1012480000 | 3.7483030000 |
